# Supplementary material for: “Effects of Bacillus Velezensis D-18 on Health Status of European Seabass (Dicentrarchus labrax) Experimentally Challenged with Vibrio harveyi”
Source: Springer Nature journal article supplement (doi:10.1007/s12602-025-10833-7), 2025-11-13
Supplement: MOESM1 [file 12602_2025_10833_MOESM1_ESM.pdf]

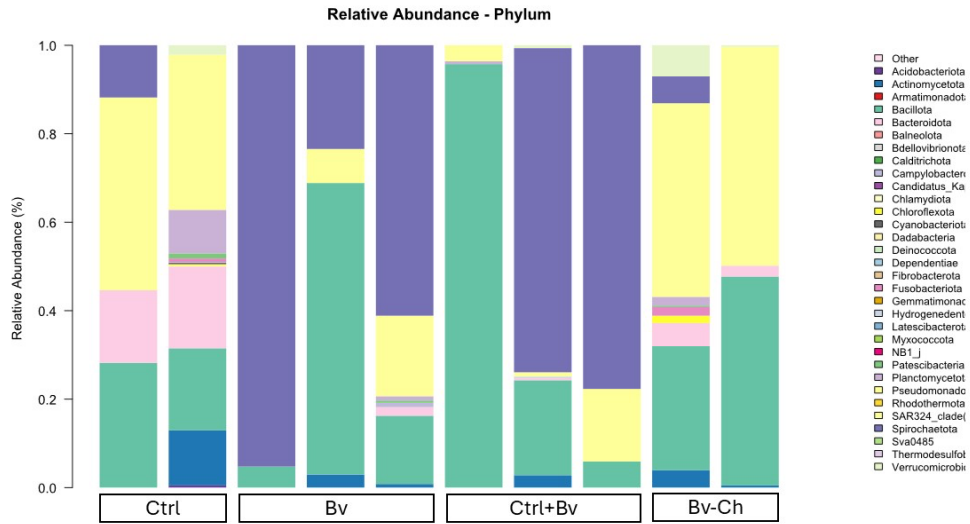

**Supplementary figure 1.** Microbiota composition of gut samples of European seabass fed with different diet. Barplot showing the microbiota composition at phylum level of fishes' gut.

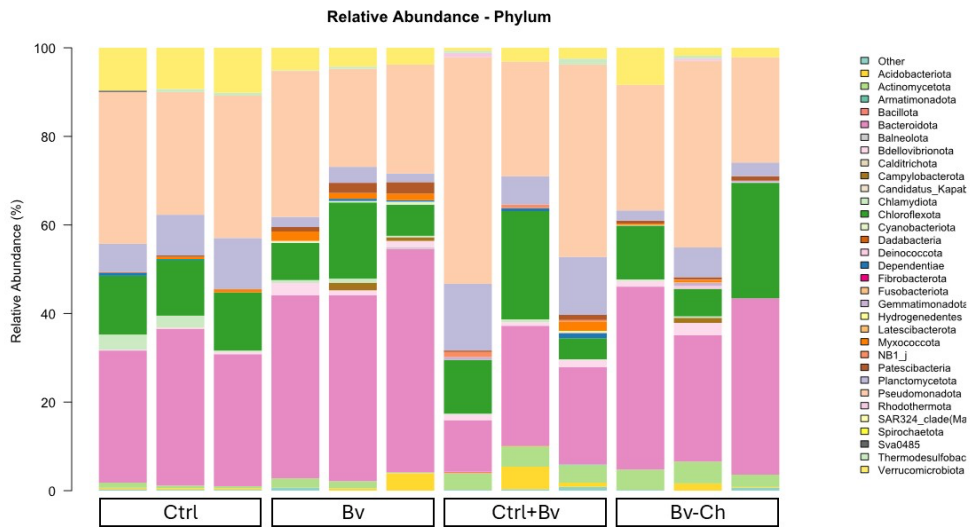

**Supplementary figure 2.** Microbiota composition of tank swab of European seabass fed with different diet. Barplot showing the microbiota composition at phylum level of tank biofilm.

|                                 | Families composition of biofilm samples (filtered) |          |          |          |          |          |          |          |          |          |          |          |
|---------------------------------|----------------------------------------------------|----------|----------|----------|----------|----------|----------|----------|----------|----------|----------|----------|
|                                 | Ctrl                                               |          |          | Bv       |          |          | Ctrl+Bv  |          |          | Bv+Ch    |          |          |
|                                 | A1                                                 | A2       | A3       | B1       | B2       | B3       | C1       | C2       | C3       | D1       | D2       | D3       |
| <i>Thermoanaerobaculaceae</i>   | 0,00000                                            | 0,00000  | 0,00000  | 0,00000  | 0,49180  | 3,93443  | 0,00000  | 4,75410  | 0,98361  | 0,00000  | 0,81967  | 0,16393  |
| <i>Microtrichaceae</i>          | 0,00000                                            | 0,00000  | 0,00000  | 1,80328  | 1,31148  | 0,16393  | 3,11475  | 4,09836  | 2,62295  | 2,95082  | 3,11475  | 2,78689  |
| <i>Chitinophagaceae</i>         | 0,00000                                            | 0,49180  | 0,65574  | 7,70492  | 2,13115  | 9,34426  | 0,00000  | 0,00000  | 0,49180  | 0,81967  | 0,00000  | 0,00000  |
| <i>Saprospiraceae</i>           | 7,37705                                            | 12,95082 | 9,34426  | 19,83607 | 19,50820 | 26,22951 | 2,95082  | 2,29508  | 3,44262  | 16,39344 | 21,96721 | 2,45902  |
| <i>Cyclobacteriaceae</i>        | 0,00000                                            | 0,00000  | 0,00000  | 0,00000  | 0,49180  | 0,65574  | 0,00000  | 0,00000  | 0,81967  | 0,00000  | 1,63934  | 0,00000  |
| <i>Microscillaceae</i>          | 3,77049                                            | 2,62295  | 2,29508  | 0,00000  | 0,00000  | 0,00000  | 0,00000  | 0,49180  | 0,00000  | 0,65574  | 0,16393  | 1,63934  |
| <i>Flavobacteriaceae</i>        | 17,54098                                           | 17,21311 | 15,08197 | 12,78689 | 14,91803 | 4,75410  | 8,03279  | 22,29508 | 13,44262 | 21,80328 | 1,80328  | 34,26230 |
| <i>Pseudobdellovibrionaceae</i> | 0,00000                                            | 0,16393  | 0,49180  | 2,78689  | 1,14754  | 0,98361  | 0,81967  | 0,81967  | 1,63934  | 1,14754  | 0,98361  | 0,00000  |
| <i>Caldilineaceae</i>           | 0,98361                                            | 0,00000  | 1,31148  | 1,14754  | 1,47541  | 0,00000  | 1,31148  | 0,98361  | 0,00000  | 0,98361  | 0,81967  | 2,29508  |
| <i>Myxococcaceae</i>            | 0,00000                                            | 0,00000  | 0,00000  | 0,98361  | 0,49180  | 0,65574  | 0,00000  | 0,00000  | 0,98361  | 0,00000  | 0,00000  | 0,00000  |
| <i>Nannocystaceae</i>           | 0,00000                                            | 0,32787  | 0,00000  | 1,14754  | 0,81967  | 0,49180  | 0,00000  | 0,00000  | 0,65574  | 0,00000  | 0,00000  | 0,00000  |
| <i>Phycisphaeraceae</i>         | 0,49180                                            | 0,00000  | 0,49180  | 0,49180  | 0,49180  | 0,65574  | 0,81967  | 0,49180  | 2,62295  | 0,00000  | 1,31148  | 0,00000  |
| <i>Pirellulaceae</i>            | 4,59016                                            | 7,37705  | 8,36066  | 0,98361  | 2,13115  | 0,81967  | 5,57377  | 3,11475  | 5,73770  | 1,96721  | 1,96721  | 2,29508  |
| <i>Rubinisphaeraceae</i>        | 1,14754                                            | 0,98361  | 1,14754  | 0,00000  | 0,00000  | 0,00000  | 1,80328  | 0,98361  | 1,47541  | 0,00000  | 0,81967  | 0,00000  |
| <i>Hyphomonadaceae</i>          | 2,95082                                            | 1,63934  | 2,95082  | 4,09836  | 0,98361  | 0,65574  | 6,72131  | 2,95082  | 3,44262  | 5,90164  | 5,01967  | 2,29508  |
| <i>Parvularculaceae</i>         | 0,00000                                            | 0,16393  | 0,49180  | 0,00000  | 0,00000  | 0,00000  | 1,47541  | 0,00000  | 0,00000  | 0,00000  | 0,32787  | 0,98361  |
| <i>Devosiaceae</i>              | 0,00000                                            | 0,00000  | 0,65574  | 0,00000  | 0,00000  | 0,98361  | 0,00000  | 0,65574  | 0,49180  | 0,00000  | 4,91803  | 1,31148  |
| <i>Rhizobiaceae</i>             | 0,81967                                            | 0,65574  | 1,80328  | 1,31148  | 0,00000  | 1,47541  | 3,93443  | 2,62295  | 2,13115  | 1,14754  | 3,60656  | 0,00000  |
| <i>Micavibrionaceae</i>         | 1,31148                                            | 0,32787  | 1,14754  | 0,00000  | 0,00000  | 0,00000  | 0,32787  | 0,00000  | 0,00000  | 0,00000  | 0,00000  | 0,00000  |
| <i>Paracoccaceae</i>            | 13,11475                                           | 12,29508 | 10,81967 | 12,45902 | 5,08197  | 6,39344  | 10,81967 | 7,54098  | 13,60656 | 8,19672  | 7,54098  | 7,70492  |
| <i>Sphingomonadaceae</i>        | 4,42623                                            | 2,78689  | 4,42623  | 1,63934  | 2,45902  | 0,00000  | 0,00000  | 0,98361  | 0,49180  | 4,26230  | 2,62295  | 2,62295  |
| <i>Leucotrichaceae</i>          | 0,00000                                            | 0,00000  | 0,00000  | 0,00000  | 2,45902  | 0,00000  | 0,00000  | 0,00000  | 0,00000  | 0,00000  | 0,00000  | 1,63934  |
| <i>Alteromonadaceae</i>         | 0,00000                                            | 0,00000  | 0,00000  | 0,49180  | 0,32787  | 1,31148  | 0,00000  | 0,00000  | 0,65574  | 0,65574  | 0,00000  | 2,29508  |
| <i>Enterobacteriaceae</i>       | 2,78689                                            | 1,96721  | 0,81967  | 0,98361  | 2,29508  | 0,98361  | 0,65574  | 0,65574  | 1,31148  | 1,31148  | 0,81967  | 1,80328  |
| <i>Vibrionaceae</i>             | 0,00000                                            | 0,00000  | 0,16393  | 0,65574  | 0,81967  | 0,00000  | 0,00000  | 0,00000  | 1,80328  | 0,00000  | 0,00000  | 0,00000  |
| <i>Rhodanobacteraceae</i>       | 0,65574                                            | 0,00000  | 0,00000  | 0,00000  | 0,00000  | 0,00000  | 0,00000  | 0,00000  | 2,45902  | 0,00000  | 0,00000  | 0,00000  |
| <i>Halieaceae</i>               | 0,00000                                            | 0,00000  | 0,32787  | 0,98361  | 0,49180  | 0,65574  | 0,16393  | 0,00000  | 1,31148  | 0,00000  | 0,00000  | 0,00000  |
| <i>Marinobacteraceae</i>        | 0,00000                                            | 0,00000  | 0,00000  | 0,00000  | 0,00000  | 3,77049  | 0,32787  | 0,00000  | 1,14754  | 0,00000  | 0,00000  | 0,00000  |
| <i>Portioccaceae</i>            | 0,00000                                            | 0,00000  | 0,00000  | 0,00000  | 0,00000  | 0,00000  | 1,31148  | 0,00000  | 0,00000  | 0,00000  | 1,31148  | 0,00000  |
| <i>Woeseiaceae</i>              | 0,65574                                            | 1,47541  | 0,98361  | 0,00000  | 0,00000  | 0,00000  | 4,75410  | 2,13115  | 2,29508  | 0,00000  | 0,81967  | 0,00000  |
| <i>Rubritaleaceae</i>           | 9,67213                                            | 9,34426  | 9,83607  | 5,08197  | 4,26230  | 3,77049  | 0,32787  | 3,11475  | 1,96721  | 8,36066  | 0,65574  | 2,13115  |
| <i>Other families</i>           | 1,92037                                            | 1,92037  | 1,77986  | 1,49883  | 2,13115  | 2,06089  | 2,66979  | 2,56440  | 2,03747  | 1,54567  | 2,43560  | 2,08431  |

Table 1 Biofilm families composition

|                            | Families composition of fish gut samples (filtered) |          |          |          |          |          |          |          |          |          |
|----------------------------|-----------------------------------------------------|----------|----------|----------|----------|----------|----------|----------|----------|----------|
|                            | Ctrl                                                |          | Bv       |          |          | Ctrl+Ch  |          | Bv+Ch    |          |          |
|                            | A1                                                  | A2       | B1       | B2       | B3       | C1       | C2       | D1       | D2       | D3       |
| <i>Alicyclobacillaceae</i> | 4,91803                                             | 15,57377 | 0,00000  | 0,00000  | 3,60656  | 0,00000  | 0,00000  | 0,00000  | 0,00000  | 0,00000  |
| <i>Bacillaceae</i>         | 3,11475                                             | 2,29508  | 0,00000  | 0,00000  | 0,00000  | 0,00000  | 0,00000  | 4,26230  | 9,83607  | 0,00000  |
| <i>Erysipelotrichaceae</i> | 0,65574                                             | 0,00000  | 1,47541  | 0,98361  | 0,00000  | 0,00000  | 0,00000  | 0,00000  | 0,00000  | 0,00000  |
| <i>Carnobacteriaceae</i>   | 0,00000                                             | 0,00000  | 0,00000  | 5,24590  | 0,00000  | 0,00000  | 0,00000  | 0,00000  | 0,00000  | 3,77049  |
| <i>Lactobacillaceae</i>    | 9,18033                                             | 0,00000  | 2,62295  | 0,00000  | 2,29508  | 12,29508 | 0,00000  | 0,00000  | 0,00000  | 5,40984  |
| <i>Streptococcaceae</i>    | 8,03279                                             | 0,00000  | 0,00000  | 30,81967 | 8,03279  | 43,60656 | 20,00000 | 0,00000  | 0,00000  | 38,03279 |
| <i>Gemellaceae</i>         | 0,00000                                             | 0,00000  | 0,00000  | 0,00000  | 0,00000  | 0,00000  | 0,00000  | 1,63934  | 3,27869  | 0,00000  |
| <i>Lachnospiraceae</i>     | 0,00000                                             | 0,00000  | 0,00000  | 28,85246 | 0,00000  | 39,83607 | 0,00000  | 0,00000  | 14,91803 | 0,00000  |
| <i>Saprospiraceae</i>      | 8,52459                                             | 3,60656  | 0,00000  | 0,00000  | 0,00000  | 0,00000  | 0,00000  | 0,00000  | 0,00000  | 0,00000  |
| <i>Flavobacteriaceae</i>   | 6,55738                                             | 10,98361 | 0,00000  | 0,00000  | 1,96721  | 0,00000  | 0,00000  | 0,00000  | 5,24590  | 0,81967  |
| <i>Fusobacteriaceae</i>    | 0,00000                                             | 0,81967  | 0,00000  | 0,00000  | 0,00000  | 0,00000  | 0,00000  | 0,00000  | 1,96721  | 0,00000  |
| <i>Gemmataceae</i>         | 0,00000                                             | 0,16393  | 0,00000  | 0,00000  | 0,00000  | 0,65574  | 0,00000  | 0,00000  | 1,96721  | 0,00000  |
| <i>Pirellulaceae</i>       | 0,00000                                             | 6,55738  | 0,00000  | 0,00000  | 0,98361  | 0,00000  | 0,00000  | 0,00000  | 0,00000  | 0,00000  |
| <i>Acetobacteraceae</i>    | 0,00000                                             | 0,65574  | 0,00000  | 0,00000  | 0,00000  | 0,00000  | 0,00000  | 0,00000  | 3,11475  | 0,00000  |
| <i>Paracoccaceae</i>       | 0,00000                                             | 3,27869  | 0,00000  | 0,00000  | 0,00000  | 0,00000  | 0,00000  | 0,00000  | 0,00000  | 10,81967 |
| <i>Sphingomonadaceae</i>   | 0,00000                                             | 2,78689  | 0,00000  | 0,00000  | 1,80328  | 0,00000  | 0,00000  | 0,00000  | 7,54098  | 0,00000  |
| <i>Alteromonadaceae</i>    | 0,00000                                             | 0,00000  | 0,00000  | 0,00000  | 6,06557  | 2,95082  | 0,00000  | 0,00000  | 0,00000  | 0,00000  |
| <i>Enterobacteriaceae</i>  | 32,45902                                            | 0,00000  | 0,00000  | 2,45902  | 0,00000  | 0,00000  | 0,00000  | 0,00000  | 26,55738 | 0,00000  |
| <i>Vibrionaceae</i>        | 0,00000                                             | 0,00000  | 0,00000  | 5,24590  | 7,86885  | 0,00000  | 0,00000  | 0,00000  | 0,00000  | 0,00000  |
| <i>Halomonadaceae</i>      | 0,00000                                             | 1,31148  | 0,00000  | 0,00000  | 2,45902  | 0,00000  | 0,00000  | 0,00000  | 5,08197  | 4,26230  |
| <i>Pseudomonadaceae</i>    | 0,00000                                             | 0,00000  | 0,00000  | 0,00000  | 0,00000  | 0,00000  | 0,00000  | 16,39344 | 0,00000  | 31,47541 |
| <i>Spirochaetaceae</i>     | 11,80328                                            | 0,00000  | 95,24590 | 23,44262 | 61,14754 | 0,00000  | 73,27869 | 77,70492 | 6,06557  | 0,00000  |
| <i>Chthoniobacteraceae</i> | 0,00000                                             | 0,81967  | 0,00000  | 0,00000  | 0,00000  | 0,00000  | 0,65574  | 0,00000  | 7,04918  | 0,00000  |
| <i>Other Families</i>      | 14,75410                                            | 48,03279 | 0,65574  | 2,95082  | 2,95082  | 0,65574  | 6,06557  | 0,00000  | 7,37705  | 5,40984  |

Table 2 Fish gut families composition
